# Supplementary material
Source: Springer Nature journal article supplement (https://www.springermedizin.de/resource/supplementary/12882_2013_772_MOESM5_ESM.pdf/9454686)

**a Addition of 5% Normal human serum (NHS)**

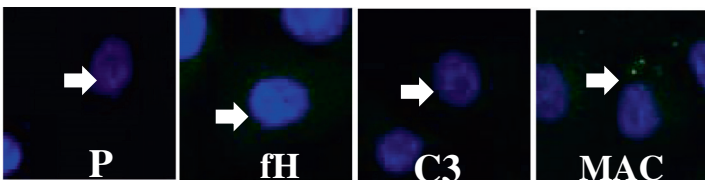

**b Addition of 5% NHS after incubation with P**

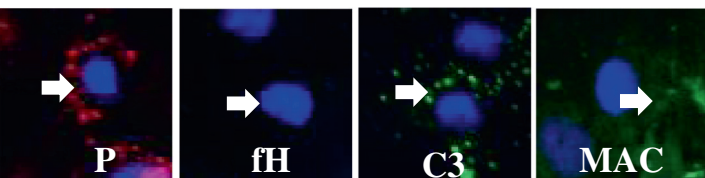

**c Addition of 25% NHS**

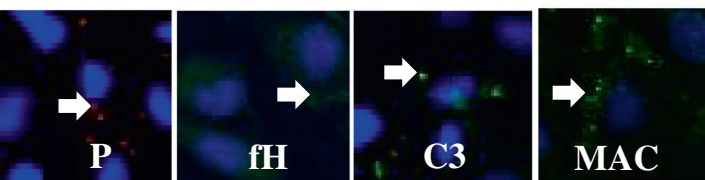

**d Addition of 25% NHS after incubation with P**

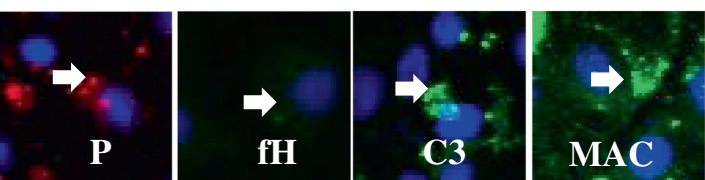

**e**

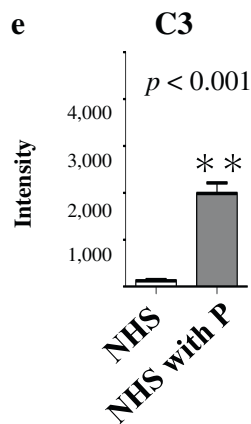

**f**

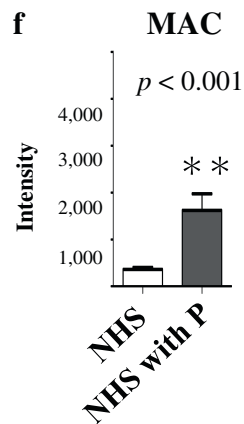

**g**

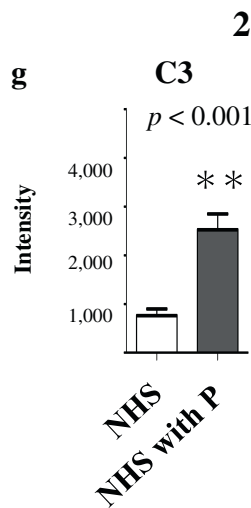

**h**

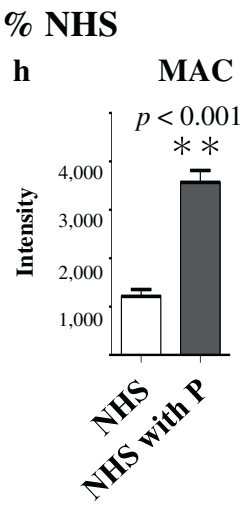

Supplement: MOESM5 [file 9454686]
